# Supplementary material for: Electrostatically driven unidirectional molecular flux for high performance alkaline flow batteries
Source: Royal Society of Chemistry journal article supplement (doi:10.1039/d3nr02727a), 2023-01-01
Supplement: d3nr02727a1.pdf [file d3nr02727a1.pdf]

## Electronic Supporting Information

### **Electrostatically Driven Unidirectional Molecular Flux for High Performance Alkaline Flow Batteries**

Bhojkumar Nayak, Ritwik Mondal, and Musthafa Ottakam Thotiyal\*

Department of Chemistry, Indian Institute of Science Education and Research (IISER)-Pune,  
Dr. Homi Bhabha Road, Pashan, Pune 411008, Maharashtra, India.

E-mail: [musthafa@iiserpune.ac.in](mailto:musthafa@iiserpune.ac.in)

## Table of Contents

|                                                                                          |    |
|------------------------------------------------------------------------------------------|----|
| <b>Fig. S1</b> Cyclic voltammogram with different concentrations of PDDA in CNT (+)..... | 3  |
| <b>Fig. S2</b> ATR-FTIR and TGA spectra .....                                            | 4  |
| <b>Fig. S3</b> XRD spectra and SEM images .....                                          | 5  |
| <b>Fig. S4</b> Scan rate-dependent studies.....                                          | 6  |
| <b>Calculation S1</b> .....                                                              | 7  |
| <b>Fig. S5</b> RDE studies .....                                                         | 9  |
| <b>Fig. S6</b> BET surface area measurements .....                                       | 10 |
| <b>Fig. S7</b> I-V measurements for electrical conductivity .....                        | 10 |
| <b>Fig. S8</b> Contact angle measurements .....                                          | 10 |
| <b>Equation S1-S3</b> .....                                                              | 11 |
| <b>Fig. S9</b> Rate capability plot .....                                                | 12 |
| <b>Fig. S10</b> Charge-discharge cycling .....                                           | 12 |
| <b>Calculation S2</b> .....                                                              | 13 |
| <b>Fig. S11</b> TEM images of CNT (+) after charge-discharge .....                       | 14 |
| <b>Fig. S12</b> SEM images of CNT (+) after charge-discharge .....                       | 14 |
| <b>Fig. S13</b> ATR-FTIR of CNT (+) after charge-discharge .....                         | 15 |
| <b>Fig. S14</b> EDX elemental mapping.....                                               | 16 |

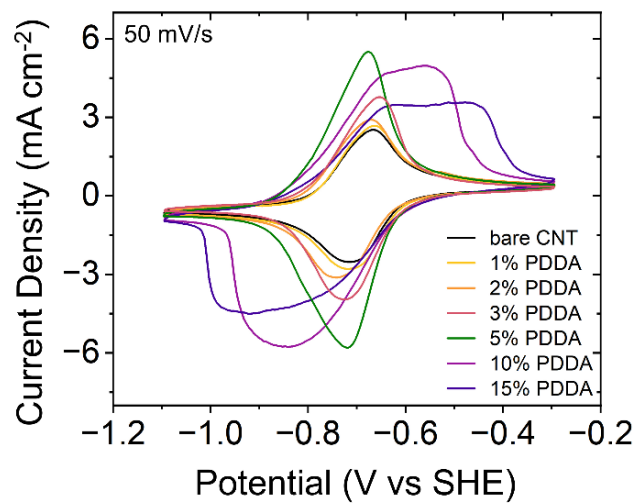

**Fig. S1** Cyclic voltammogram of 2,6-DHAQ molecule on the CNT (+) electrode with varying concentrations of PDDA in the modifying solution.

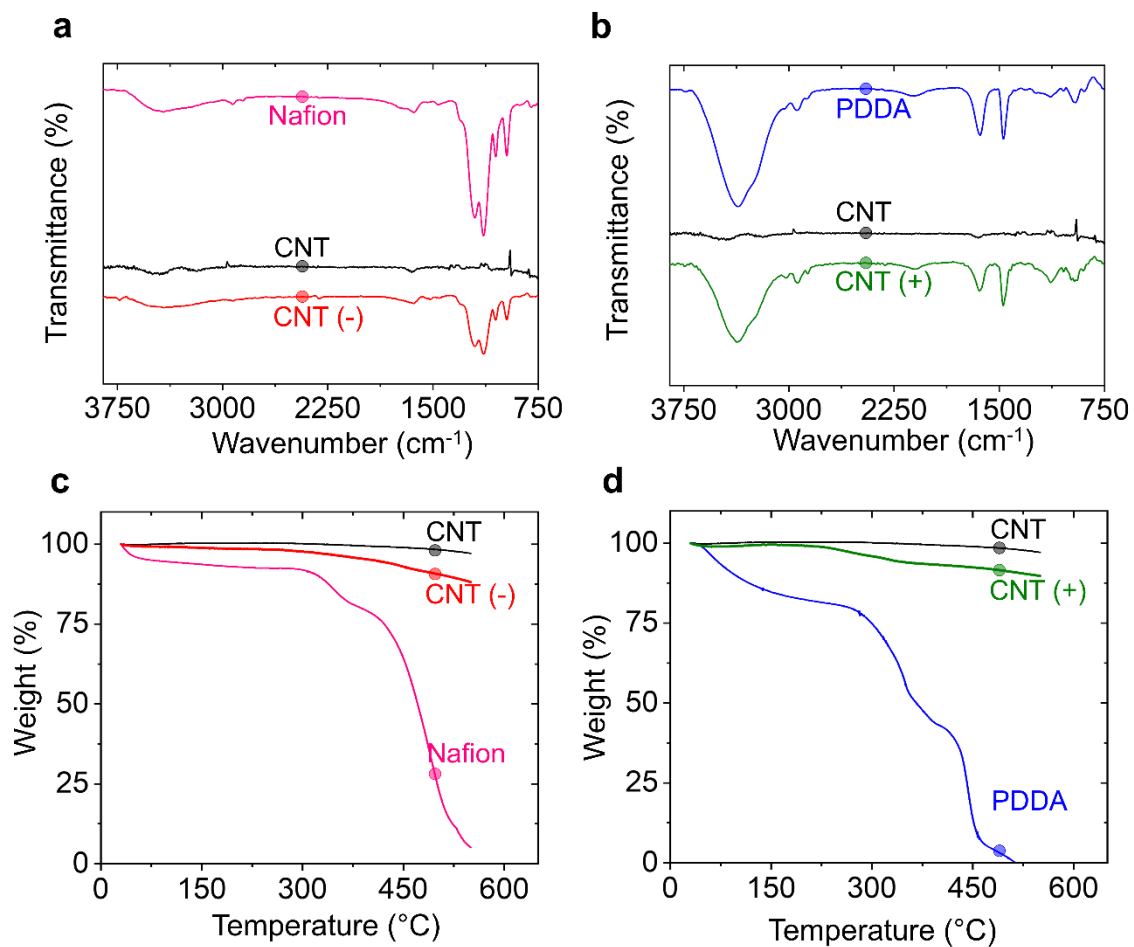

**Fig. S2** (a) ATR-FTIR spectra of CNT (-) and individual components. (b) ATR-FTIR spectra of CNT (+) and individual components. (c) TGA of CNT (-) and individual components. (d) TGA spectra of CNT (+) and individual components.

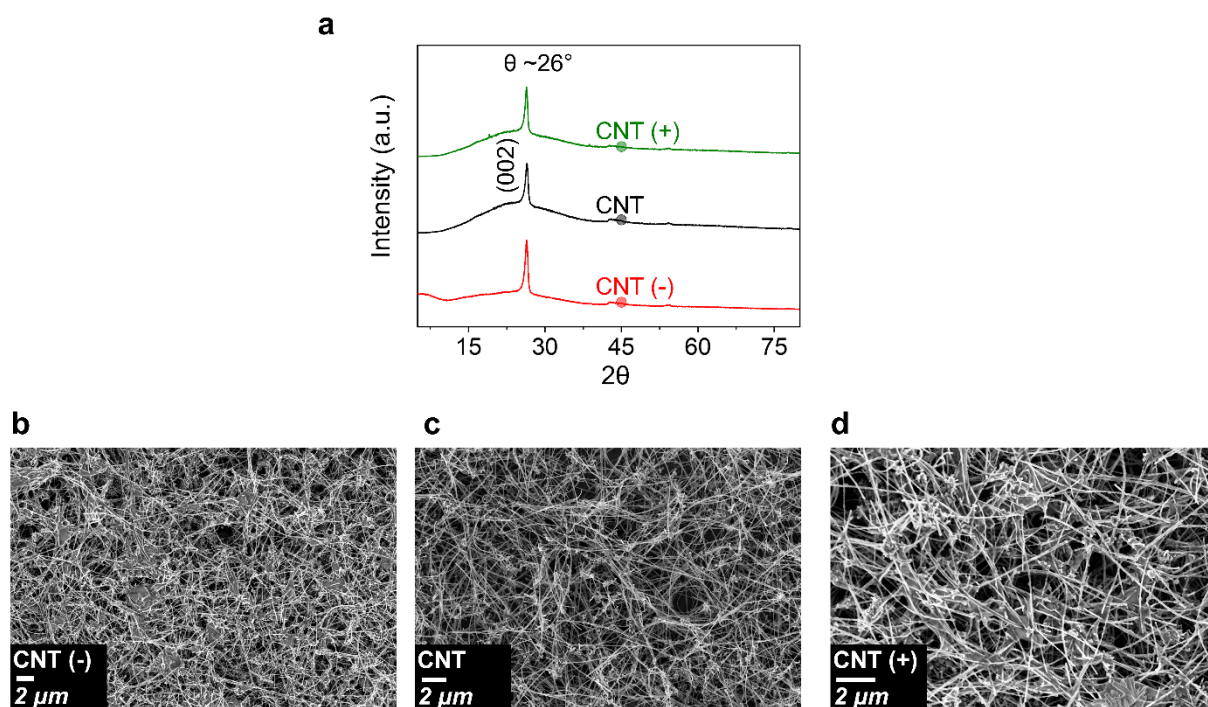

**Fig. S3 (a)** Powder-XRD for CNT (+), CNT, and CNT (-). SEM images for **(b)** CNT (-), **(c)** CNT, and **(d)** CNT (+)

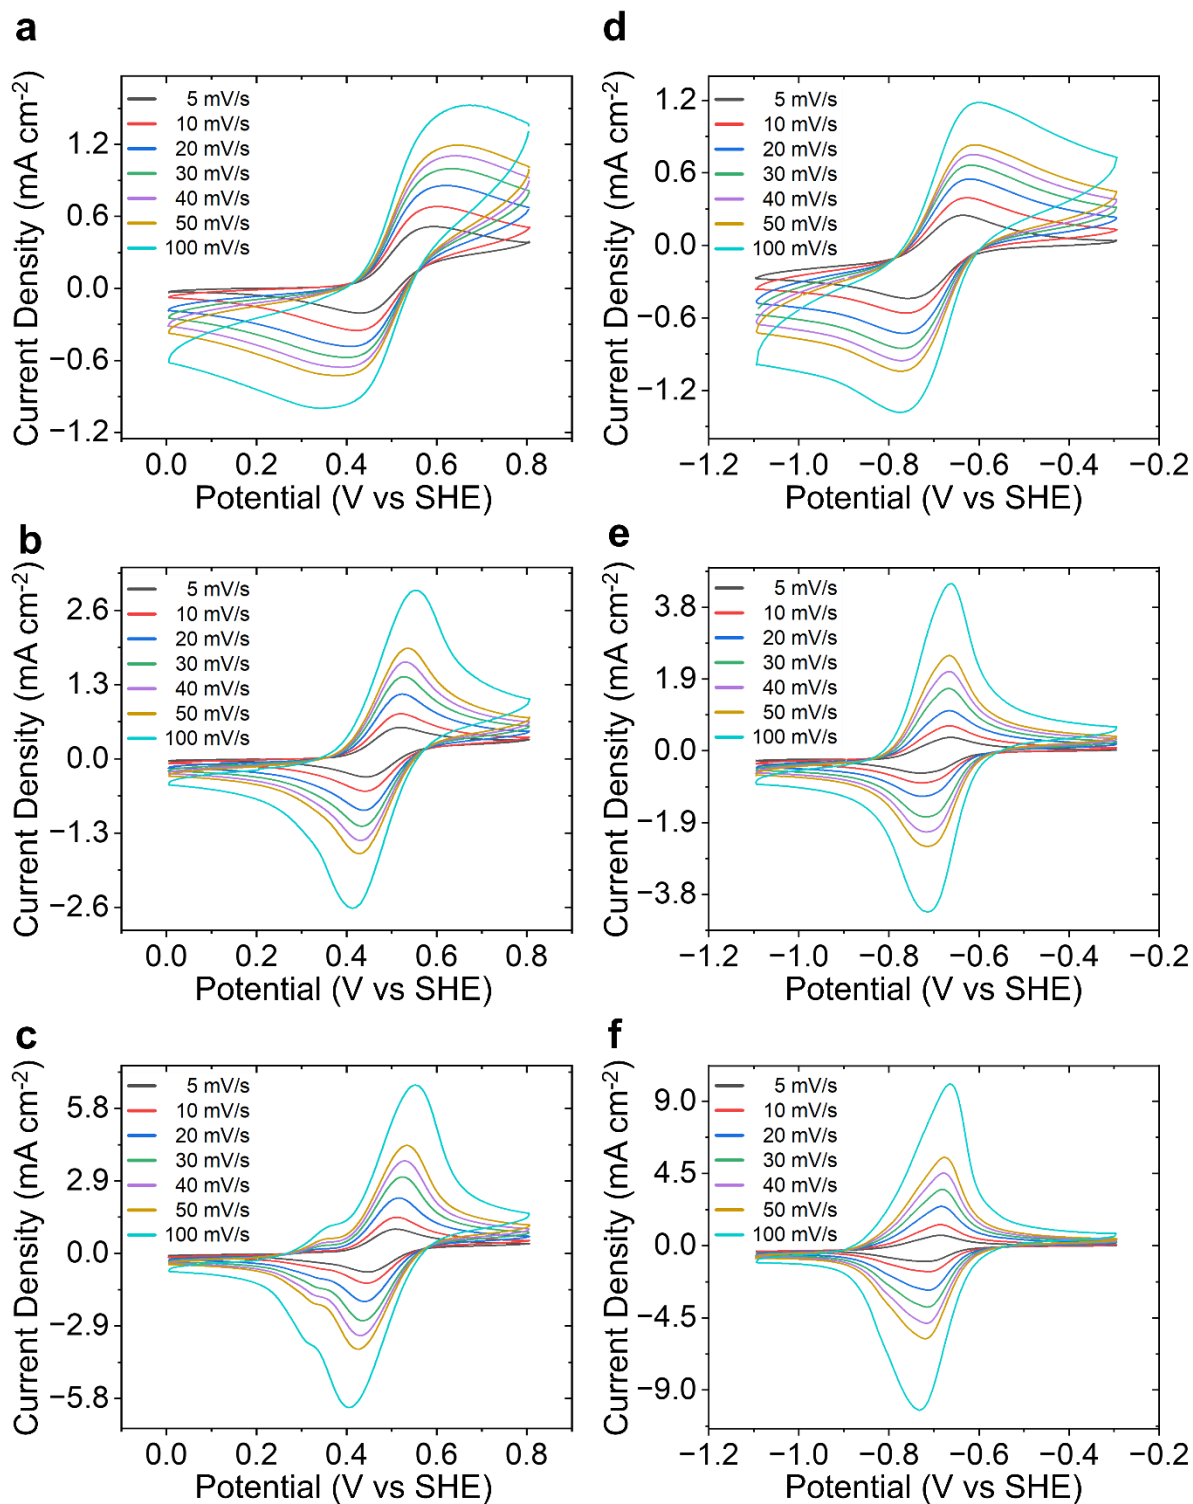

**Fig. S4** Scan rate dependence studies in 10 mM  $K_4[Fe(CN)_6]$  in 1M KOH with **(a)** CNT(-), **(b)** CNT, and **(c)** CNT(+). Scan rate dependence studies in 5 mM 2,6-DHAQ in 1 M KOH with **(d)** CNT(-), **(e)** CNT, and **(f)** CNT(+).

## Calculation S1

Mass Transfer Coefficient ( $k_m$ ) Calculation

$$k_m = \frac{i}{nFAC}$$

$k_m$  = mass transfer coefficient (cm/s),  $i$  = limiting current (mA),  $n$  = number of electrons,  $A$  = area of electrode (cm<sup>2</sup>),  $C$  = concentration (mol/cm<sup>3</sup>),  $F$  = Faraday constant (~96485 C/mol),

(a) From Fig. 3b

For 10 mM K<sub>4</sub>Fe(CN)<sub>6</sub> solution in 1 M KOH

$$C = 0.01 \text{ mmol/ cm}^3$$

$$A = 0.196 \text{ cm}^2$$

$$n = 1$$

- For CNT (-)

$$\begin{aligned} k_m &= \frac{i}{nFAC} \\ &= \frac{4.667}{96485 \cdot 0.01} = 0.00483 \text{ cm/s} \end{aligned}$$

- (ii) For CNT

$$\begin{aligned} k_m &= \frac{i}{nFAC} \\ &= \frac{7.137}{96485 \cdot 0.01} = 0.00739 \text{ cm/s} \end{aligned}$$

- (iii) For CNT (+)

$$\begin{aligned} k_m &= \frac{i}{nFAC} \\ &= \frac{10.9}{96485 \cdot 0.01} = 0.0113 \text{ cm/s} \end{aligned}$$

(b) From Fig. 3d

For 5 mM 2,6-DHAQ solution in 1 M KOH

$$C = 0.005 \text{ mmol/ cm}^3$$

$$A = 0.196 \text{ cm}^2$$

$$n = 2$$

- For CNT (-)

$$k_m = \frac{i}{nFAC}$$
$$= \frac{2.961}{2 * 96485 * 0.005} = 0.003 \text{ cm/s}$$

- (ii) For CNT

$$k_m = \frac{i}{nFAC}$$
$$= \frac{5.069}{2 * 96485 * 0.005} = 0.005 \text{ cm/s}$$

- (iii) For CNT (+)

$$k_m = \frac{i}{nFAC}$$
$$= \frac{7.388}{2 * 96485 * 0.005} = 0.0076 \text{ cm/s}$$



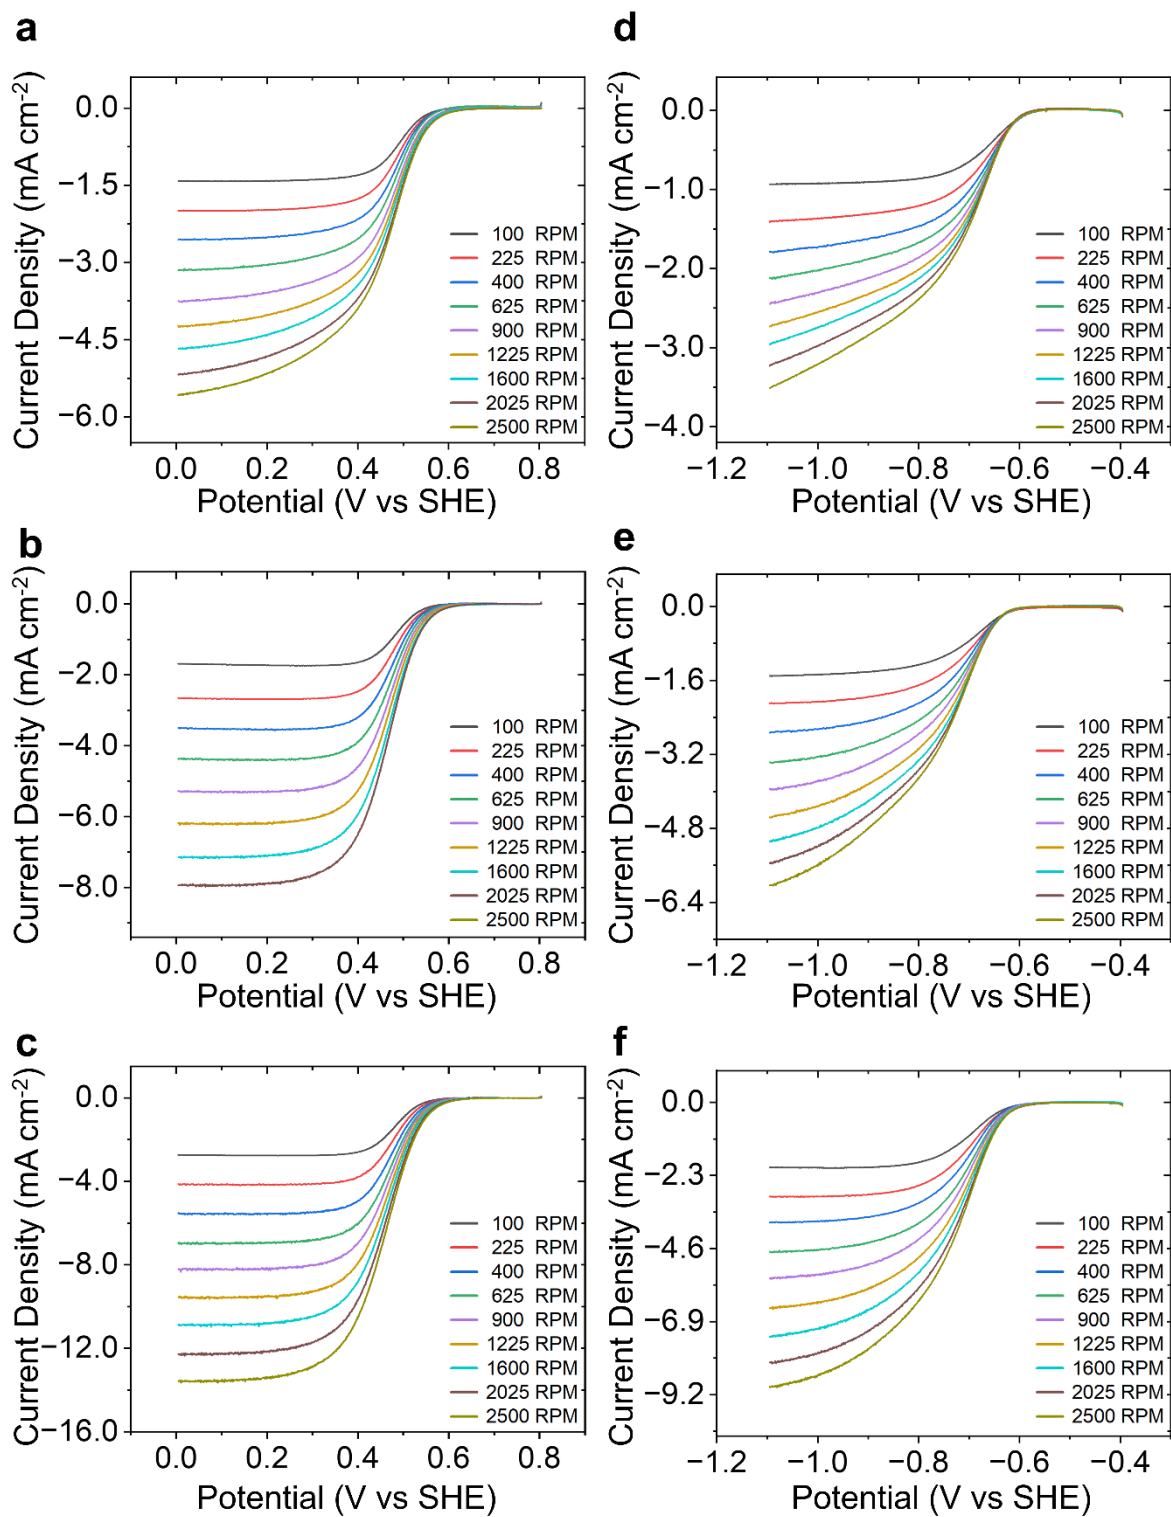

**Fig. S5** RDE studies at different rotations for 10 mM  $K_3[Fe(CN)_6]$  in 1 M KOH with **(a)** CNT (-), **(b)** CNT and **(c)** CNT (+). RDE studies at different rotations for 5 mM 2,6-DHAQ in 1 M KOH with **(d)** CNT (-), **(e)** CNT and **(f)** CNT (+).

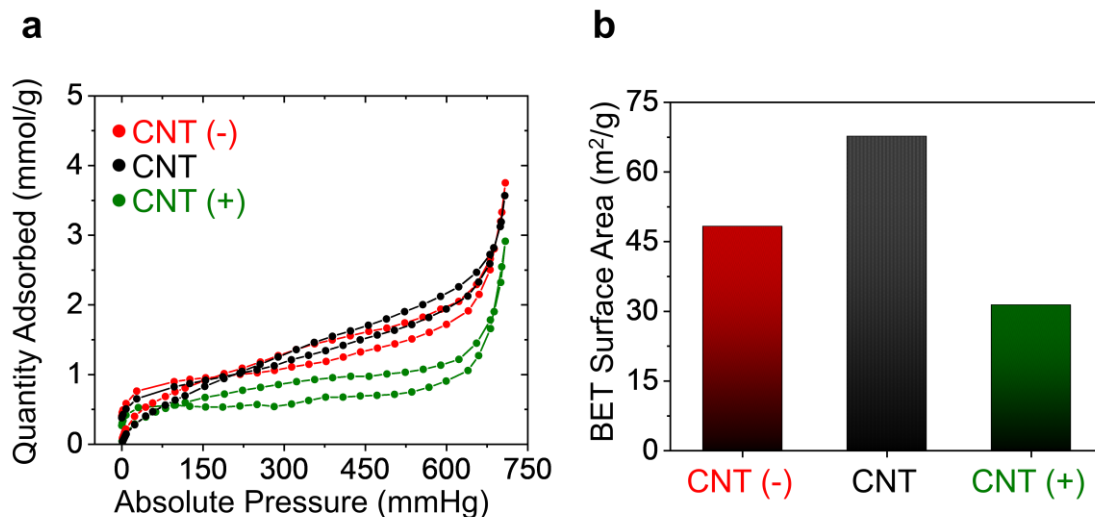

**Fig. S6 (a) and (b)** BET surface area for CNT (+), CNT and CNT (-).

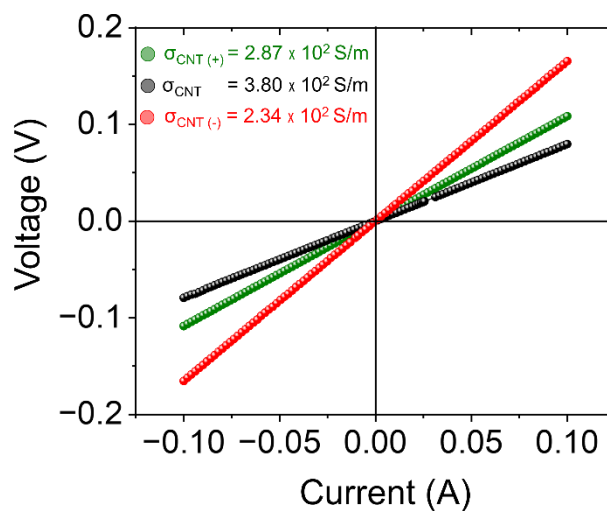

**Fig. S7** I-V data for electrical conductivity measurements extracted from the four-point probe method for CNT (+), unmodified CNT and CNT (-).

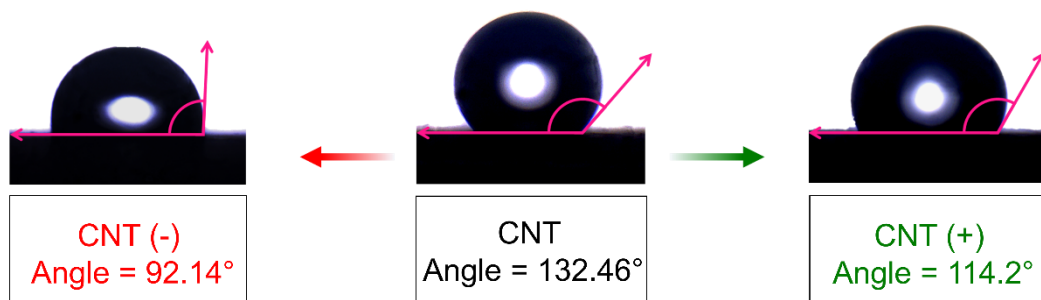

**Fig. S8** Contact angle measurements for CNT (-), CNT and CNT (+) (Left to right).

## The battery's half-cell and full-cell chemistries

Anodic Reaction (Equation S1):

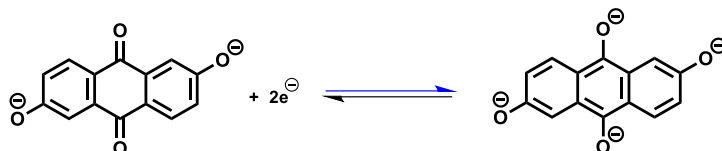

$E^\circ = -0.68 \text{ V vs SHE}$   
(pH 14)

Cathodic Reaction (Equation S2):

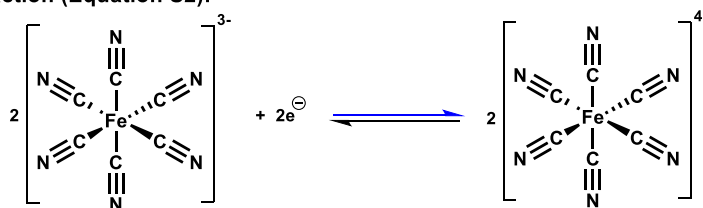

$E^\circ = 0.36 \text{ V vs SHE}$

Overall Reaction (Equation S3):

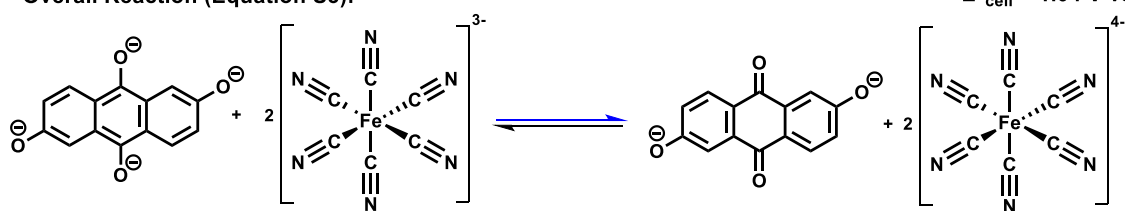

$E^\circ_{\text{cell}} = 1.04 \text{ V vs SHE}$

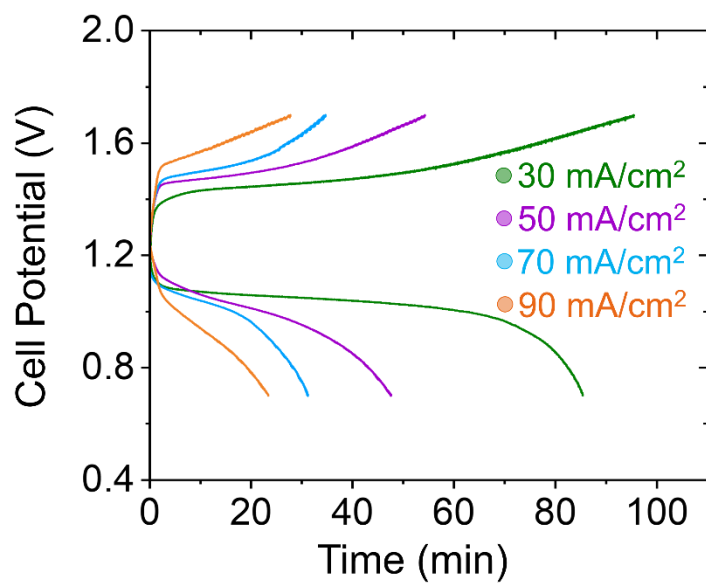

**Fig. S9** Charge-discharge cycling of the redox flow battery equipped with the CNT (+) electrode at various current densities.

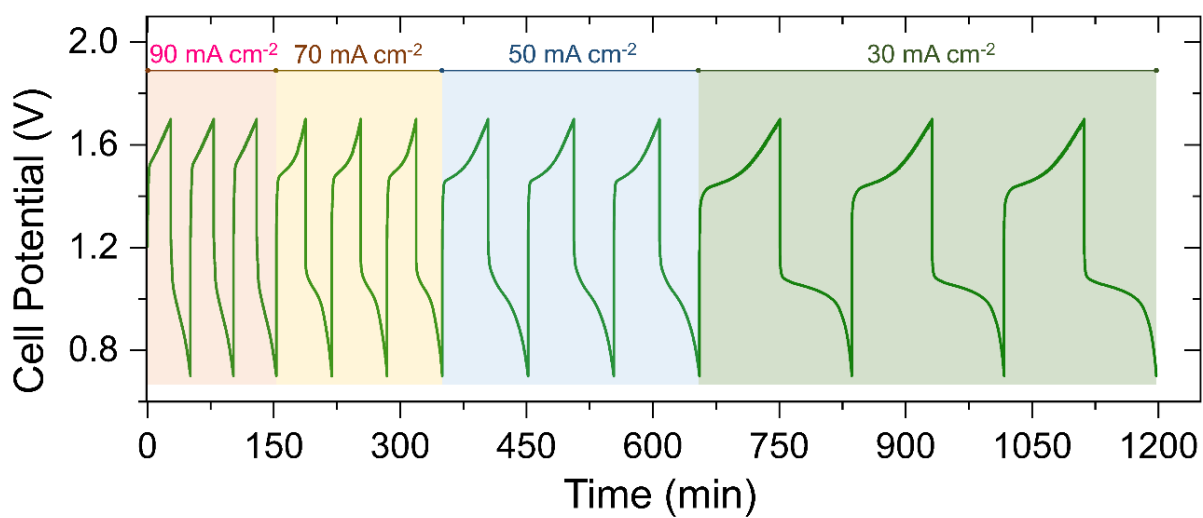

**Fig. S10** Charge-discharge cycling of the redox flow battery equipped with the CNT (+) electrode at various current densities. Here, the data is shown as a function of time.

## Calculation S2

### Energy Efficiency (EE) Calculation

$$EE = \frac{(C*V)_{discharge}}{(C*V)_{charge}}$$

From Fig. 4d

- In case of CNT (-)

$$\begin{aligned} EE &= \frac{\text{Area under the discharge curve (red discharge trace in Figure 4d)}}{\text{Area under the charge curve (red charge trace in Figure 4d)}} \\ &= \frac{208.89}{456.10} \\ &= 45.79 \% \end{aligned}$$

- In case of CNT

$$\begin{aligned} EE &= \frac{\text{Area under the discharge curve (black discharge trace in Figure 4d)}}{\text{Area under the charge curve (black charge trace in Figure 4d)}} \\ &= \frac{465.36}{684.21} \\ &= 68.01 \% \end{aligned}$$

- In case of CNT (+)

$$\begin{aligned} EE &= \frac{\text{Area under the discharge curve (olive green discharge trace in Figure 4d)}}{\text{Area under the charge curve (olive green charge trace in Figure 4d)}} \\ &= \frac{857.55}{933.23} \\ &= 91.89 \% \end{aligned}$$

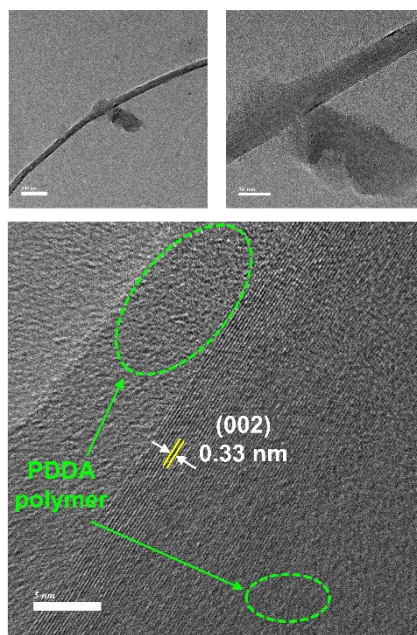

**Fig. S11** TEM images of CNT (+) after charge-discharge cycling.

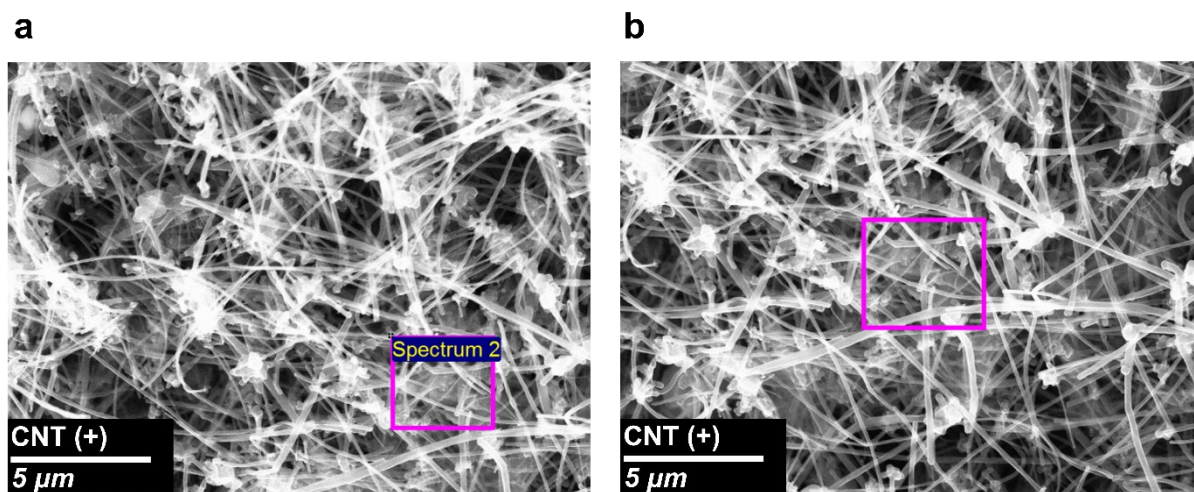

**Fig. S12** SEM images of CNT (+) electrode utilized **(a)** at the cathodic interface and **(b)** at the anodic interface after long term charge-discharge.

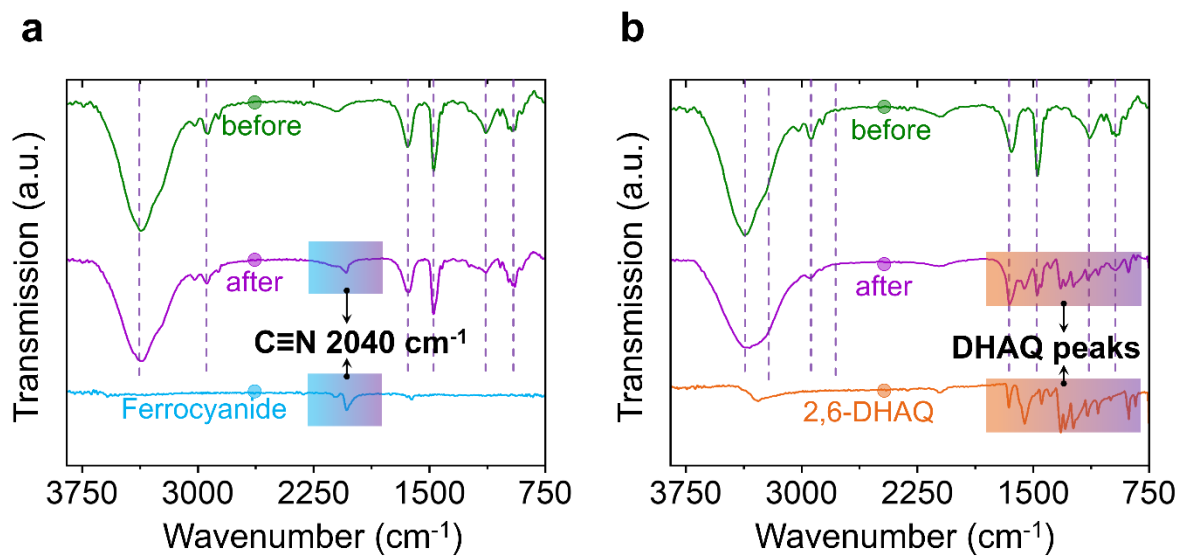

**Fig. S13** ATR-FTIR spectra of CNT (+) electrode utilized **(a)** at the cathodic interface and **(b)** at the anodic interface before and after charge-discharge cycling.

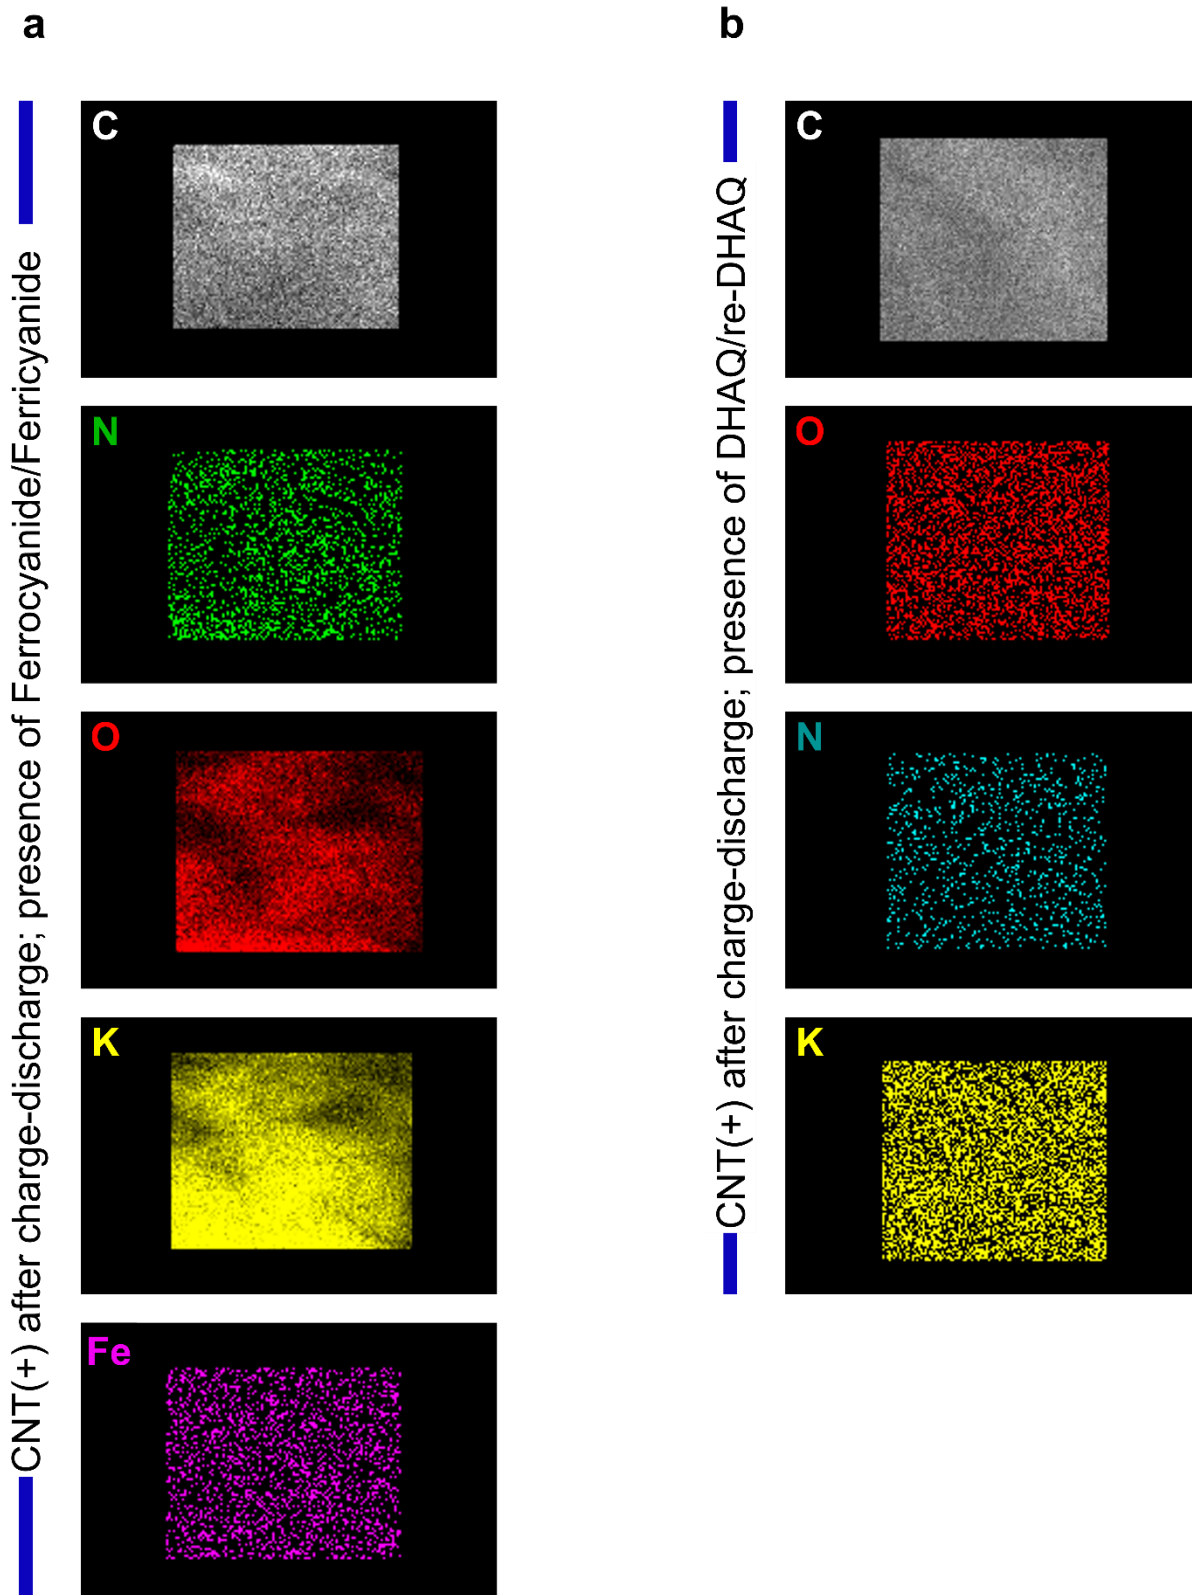

**Fig. S14** EDX elemental mapping of CNT (+) electrode utilized **(a)** at the cathodic interface and **(b)** at the anodic interface after charge-discharge cycling. The signals of O, K and Fe in Fig. S14a originates from adsorbed iron species whereas the signals of K and O in Fig. S14b originates from adsorbed quinone molecule
